# Supplementary material for: Correlates of Treatment and Disease Burden in People Living with HIV (PLHIV) in Italy
Source: MDPI journal article supplement (doi:10.3390/jcm11020471), 2022-01-17
Supplement: s1 [file s1]

*Italian version of the Survey*

**CAPIRE DAL VISSUTO DELLA PERSONA CON HIV L'ESPERIENZA SULLA TERAPIA  
E SULLA GESTIONE DELLA SALUTE**

**INDAGINE RIVOLTA A PERSONE CON HIV CHE ASSUMONO TERAPIA ANTIRETROVIRALE**

**1. Caratteristiche sociodemografiche**

**CHI SEI?**

**PUOI DIRCI QUALCHE COSA DI TE**

**Anno di nascita:** .....

**Sesso registrato alla nascita all'anagrafe**

|         |                          |
|---------|--------------------------|
| Maschio | <input type="checkbox"/> |
| Femmina | <input type="checkbox"/> |

**Come percepisci la tua identità di genere?**

|                |                          |
|----------------|--------------------------|
| Uomo           | <input type="checkbox"/> |
| Donna          | <input type="checkbox"/> |
| Altra identità | <input type="checkbox"/> |

**Come ti identifichi?**

|                                                                               |                          |
|-------------------------------------------------------------------------------|--------------------------|
| Cisgender*                                                                    | <input type="checkbox"/> |
| <small>*persona che si identifica con il sesso assegnato alla nascita</small> |                          |
| Transgender                                                                   | <input type="checkbox"/> |

**Come descriveresti il tuo orientamento sessuale?**

|                 |                          |
|-----------------|--------------------------|
| Omosessuale     | <input type="checkbox"/> |
| Bisessuale      | <input type="checkbox"/> |
| Eterosessuale   | <input type="checkbox"/> |
| Non specificato | <input type="checkbox"/> |

**Quale livello di educazione hai completato?**

|                                    |                          |
|------------------------------------|--------------------------|
| Scuola Media inferiore             | <input type="checkbox"/> |
| Scuola Media Superiore             | <input type="checkbox"/> |
| Università                         | <input type="checkbox"/> |
| Master post-Laurea                 | <input type="checkbox"/> |
| Altro/non so/non voglio rispondere | <input type="checkbox"/> |

**Nazione di nascita:** .....

**A quale gruppo etnico appartieni?**

|                                    |                          |
|------------------------------------|--------------------------|
| Bianco/caucasico                   | <input type="checkbox"/> |
| Afroamericano/africano             | <input type="checkbox"/> |
| Asiatico                           | <input type="checkbox"/> |
| Latino-americano                   | <input type="checkbox"/> |
| Etnia mista                        | <input type="checkbox"/> |
| Altro/non so/non voglio rispondere | <input type="checkbox"/> |

**Regione di residenza**

|            |                          |          |                          |
|------------|--------------------------|----------|--------------------------|
| Abruzzo    | <input type="checkbox"/> | Molise   | <input type="checkbox"/> |
| Basilicata | <input type="checkbox"/> | Piemonte | <input type="checkbox"/> |

|                       |                          |                     |                          |
|-----------------------|--------------------------|---------------------|--------------------------|
| Calabria              | <input type="checkbox"/> | Puglia              | <input type="checkbox"/> |
| Campania              | <input type="checkbox"/> | Sardegna            | <input type="checkbox"/> |
| Emilia-Romagna        | <input type="checkbox"/> | Sicilia             | <input type="checkbox"/> |
| Friuli-Venezia Giulia | <input type="checkbox"/> | Toscana             | <input type="checkbox"/> |
| Lazio                 | <input type="checkbox"/> | Trentino-Alto Adige | <input type="checkbox"/> |
| Liguria               | <input type="checkbox"/> | Umbria              | <input type="checkbox"/> |
| Lombardia             | <input type="checkbox"/> | Valle d'Aosta       | <input type="checkbox"/> |
| Marche                | <input type="checkbox"/> | Veneto              | <input type="checkbox"/> |

**Quale situazione descrive al meglio, ora, il tuo status relazionale?**

|                                    |                          |
|------------------------------------|--------------------------|
| Single (solo)                      | <input type="checkbox"/> |
| Sposato/a o unito/a civilmente     | <input type="checkbox"/> |
| “Ho una relazione e ci convivo”    | <input type="checkbox"/> |
| “Ho una relazione, ma non convivo” | <input type="checkbox"/> |
| Vedovo/a                           | <input type="checkbox"/> |
| Divorziato/a                       | <input type="checkbox"/> |
| Altro/non so/non voglio rispondere | <input type="checkbox"/> |

**Quale delle seguenti affermazioni descrive al meglio, ora, il tuo status lavorativo?**

|                                              |                          |
|----------------------------------------------|--------------------------|
| Lavoro stabilmente                           | <input type="checkbox"/> |
| Lavoro, ma sono (o mi sento) precario        | <input type="checkbox"/> |
| Non lavoro, perché non lo trovo, ma lo cerco | <input type="checkbox"/> |
| Non lavoro e non lo cerco                    | <input type="checkbox"/> |
| Pensionato/a                                 | <input type="checkbox"/> |
| Altro/non so/non voglio rispondere           | <input type="checkbox"/> |

**2. Caratteristiche sull'HIV della persona**

**TI CHIEDIAMO ORA QUALCHE DATO SUL TUO HIV E LA TUA SALUTE**

**QUANDO HAI AVUTO LA DIAGNOSI DI “HIV-POSITIVITÀ”?**

|                  |                          |
|------------------|--------------------------|
| Prima del 2000   | <input type="checkbox"/> |
| Dal 2001 al 2010 | <input type="checkbox"/> |
| Dal 2011 al 2015 | <input type="checkbox"/> |
| Dal 2016 in poi  | <input type="checkbox"/> |

**COME PENSI DI AVERE ACQUISITO L'INFEZIONE DA HIV?**

|                                                                                   |                          |
|-----------------------------------------------------------------------------------|--------------------------|
| Rapporti sessuali con persone del mio stesso sesso (da intendersi “alla nascita”) | <input type="checkbox"/> |
| Rapporti sessuali con persone di sesso diverso (da intendersi “alla nascita”)     | <input type="checkbox"/> |
| Rapporti sessuali (non specificato)                                               | <input type="checkbox"/> |
| Altre modalità, <u>non sessuali</u>                                               | <input type="checkbox"/> |

**QUANDO HAI INIZIATO LA TERAPIA ANTI-HIV?**

|                  |                          |
|------------------|--------------------------|
| Prima del 2000   | <input type="checkbox"/> |
| Dal 2001 al 2010 | <input type="checkbox"/> |
| Dal 2011 al 2015 | <input type="checkbox"/> |
| Dal 2016 in poi  | <input type="checkbox"/> |

**RICORDI IL TUO ULTIMO VALORE DI CELLULE CD4 (per ml)?**

|              |                          |
|--------------|--------------------------|
| MENO DI 200  | <input type="checkbox"/> |
| DA 200 A 500 | <input type="checkbox"/> |
| PIU' DI 500  | <input type="checkbox"/> |
| NON RICORDO  | <input type="checkbox"/> |

**RICORDI IL TUO ULTIMO VALORE DI CARICA VIRALE (OSSIA HIV-RNA)?**

|                               |                          |
|-------------------------------|--------------------------|
| NON RILEVATO (undetectable)   | <input type="checkbox"/> |
| RILEVATO TRA 50 E 200 (cp/mL) | <input type="checkbox"/> |
| RILEVATO OLTRE I 200 (cp/mL)  | <input type="checkbox"/> |
| NON RICORDO                   | <input type="checkbox"/> |

**QUALI FARMACI ASSUMI PER L'HIV?**

Nota alla lettura: una compressa, ossia un 'farmaco' con un determinato nome commerciale, può contenere uno o più 'principi attivi'.

|                                                                                                       |                          |
|-------------------------------------------------------------------------------------------------------|--------------------------|
| DUE PRINCIPI ATTIVI IN UNA COMPRESSA (Dovato®, Juluca®)                                               | <input type="checkbox"/> |
| TRE PRINCIPI ATTIVI IN UNA COMPRESSA (Atripla®, Biktarvy®, Delstrigo®, Eviplera®, Odefsey®, Triumeq®) | <input type="checkbox"/> |
| QUATTRO PRINCIPI IN UNA COMPRESSA (Genvoya®, Stribild®, Symtuza®)                                     | <input type="checkbox"/> |
| DUE PRINCIPI ATTIVI IN DUE COMPRESSE                                                                  | <input type="checkbox"/> |
| TRE/QUATTRO PRINCIPI IN DUE/TRE COMPRESSE – TUTTI FARMACI IN COMMERCIO                                | <input type="checkbox"/> |
| ASSUMO ANCHE FARMACI ANTI-HIV CHE NON SONO ANCORA IN COMMERCIO (SPERIMENTALI)                         | <input type="checkbox"/> |
| ALTRO                                                                                                 | <input type="checkbox"/> |
| NON RICORDO                                                                                           | <input type="checkbox"/> |

**SEI SODDISFATTO DELLA TUA TERAPIA ANTI-HIV?**

|                                    |                          |
|------------------------------------|--------------------------|
| Si, completamente                  | <input type="checkbox"/> |
| Si, ma penso si possa migliorare   | <input type="checkbox"/> |
| No, perché ho problemi             | <input type="checkbox"/> |
| No, non lo sono per niente         | <input type="checkbox"/> |
| Altro/non so/non voglio rispondere | <input type="checkbox"/> |

**PERCHÉ HAI CAMBIATO LA TERAPIA L'ULTIMA VOLTA?**

|                                                                                                                                                            |                          |
|------------------------------------------------------------------------------------------------------------------------------------------------------------|--------------------------|
| Quella che prendo è la mia prima terapia, non l'ho mai cambiata                                                                                            | <input type="checkbox"/> |
| Perché non stavo bene, non la tolleravo (effetti collaterali) e ne ho parlato col medico                                                                   | <input type="checkbox"/> |
| Perché gli esami biochimici (cioè il controllo del fegato, dei reni, il colesterolo, i trigliceridi, ecc..) non andavano bene e il medico me l'ha cambiata | <input type="checkbox"/> |
| Perché il mio medico mi ha proposto un'altra terapia senza particolari ragioni                                                                             | <input type="checkbox"/> |
| Perché prendevo troppe compresse o perché la prendevo più volte al giorno                                                                                  | <input type="checkbox"/> |
| Perché da tre principi attivi (anche in una sola compressa) sono passato a due principi attivi (anche in una sola compressa)                               | <input type="checkbox"/> |
| Perché da due principi attivi (anche in una sola compressa) sono passato a tre principi attivi (anche in una sola compressa)                               | <input type="checkbox"/> |
| Perché la carica virale era cresciuta e quindi c'era un problema di efficacia                                                                              | <input type="checkbox"/> |
| Altro/non so/non voglio rispondere                                                                                                                         | <input type="checkbox"/> |

**DELL'HIV PARLO CON...(possibili più risposte)**

|                                  |                          |
|----------------------------------|--------------------------|
| Tutti                            | <input type="checkbox"/> |
| I miei colleghi                  | <input type="checkbox"/> |
| La maggior parte di amici/amiche | <input type="checkbox"/> |

|                                                |                          |
|------------------------------------------------|--------------------------|
| La mia famiglia                                | <input type="checkbox"/> |
| Il mio/la mia partner                          | <input type="checkbox"/> |
| Qualche (anche solo uno/a) amico/a particolare | <input type="checkbox"/> |
| Il mio medico/infermiere/a e nessun altro/a    | <input type="checkbox"/> |
| Altro/non so/non voglio rispondere             | <input type="checkbox"/> |

**VORREI...(possibili più risposte)**

|                                                                                                |                          |
|------------------------------------------------------------------------------------------------|--------------------------|
| Avere più voce in capitolo nello scegliere la mia terapia anti-HIV                             | <input type="checkbox"/> |
| Poter assumere la terapia anti-HIV non tutti i giorni, grazie a farmaci appositamente studiati | <input type="checkbox"/> |
| Avere un dialogo più frequente con il mio medico infettivologo                                 | <input type="checkbox"/> |
| Essere più controllato su alcuni aspetti medici                                                | <input type="checkbox"/> |
| Parlare di più con qualcuno (un professionista) non solo degli aspetti medici dell'HIV         | <input type="checkbox"/> |
| Conoscere quando arriveranno dei nuovi farmaci e perché                                        | <input type="checkbox"/> |
| Avere un dialogo più sincero con il mio medico infettivologo                                   | <input type="checkbox"/> |
| Nulla di quanto sopra                                                                          | <input type="checkbox"/> |

**3. Caratteristiche sulla salute in generale**

TI CHIEDIAMO ORA QUALCHE DATO SU ALTRI ASPETTI DELLA TUA SALUTE...

**NELL'ULTIMO MESE, COME DESCRIVERESTI IL TUO STATO DI SALUTE?**

|                      | MOLTO BUONO              | ABBASTANZA BUONO         | NORMALE                  | SCARSO                   | MOLTO INSODDISFACENTE    |
|----------------------|--------------------------|--------------------------|--------------------------|--------------------------|--------------------------|
| Salute fisica        | <input type="checkbox"/> |
| Salute mentale       | <input type="checkbox"/> |
| Salute sessuale      | <input type="checkbox"/> |
| Salute 'complessiva' | <input type="checkbox"/> |

**CONSIDERANDO TUTTI I FARMACI O CIO' CHE PRENDI IN MODO CONTINUATIVO (sia anti-HIV sia per eventuali altre co-patologie sia per altro), QUANTE PILLOLE, BUSTINE, ECC...PRENDI OGNI GIORNO?**

1  2  3  4  5  6  7  8  9  10  Più di 10

**... E QUANTE VOLTE AL GIORNO?**

1  2  3  4  5  Più di 5

**PER TE....**

|                                                                         |                          |
|-------------------------------------------------------------------------|--------------------------|
| ...l'HIV è il problema di salute (cioè la patologia) più importante     | <input type="checkbox"/> |
| ...l'HIV non è il problema di salute (cioè la patologia) più importante | <input type="checkbox"/> |
| Non so/non voglio rispondere                                            | <input type="checkbox"/> |

**FACCIO ATTIVITÀ FISICA/SPORT ....**

|                                               |                          |
|-----------------------------------------------|--------------------------|
| In modo continuativo (2 volte alla settimana) | <input type="checkbox"/> |
| 2-4 volte al mese                             | <input type="checkbox"/> |
| No, non la faccio                             | <input type="checkbox"/> |
| Altro/non so/non voglio rispondere            | <input type="checkbox"/> |

**MANGIO....**

|                                                                                          |                          |
|------------------------------------------------------------------------------------------|--------------------------|
| In modo controllato, cibi sani, seguendo un certo regime alimentare almeno 5 giorni su 7 | <input type="checkbox"/> |
| In modo controllato, cibi sani, seguendo un certo regime alimentare almeno 2 giorni su 7 | <input type="checkbox"/> |
| In modo non controllato                                                                  | <input type="checkbox"/> |
| Altro/non so/non voglio rispondere                                                       | <input type="checkbox"/> |

#### BEVO ALCOLICI....

|                                                                        |                          |
|------------------------------------------------------------------------|--------------------------|
| In modo controllato, in compagnia, un paio di bicchieri 2 giorni su 7  | <input type="checkbox"/> |
| Un po' come capita, in compagnia, un paio di bicchieri 4/5 giorni su 7 | <input type="checkbox"/> |
| In modo non controllato                                                | <input type="checkbox"/> |
| Altro/non so/non voglio rispondere                                     | <input type="checkbox"/> |

#### 4. Carico del trattamento dell'HIV

RACCONTA LA TUA ESPERIENZA CON LA TERAPIA ANTI-HIV, CON L'ASSISTENZA E CON L'HIV

##### Informazioni mediche riguardo l'HIV e i farmaci anti-HIV

In merito "ai tempi di riferimento" di queste domande, riferisciti, se pertinente, a una media delle tue esperienze negli ultimi 6 mesi.

##### QUANTO PER TE È STATO FACILE/DIFFICILE....

|                                                                                                                      | Molto Facile | Facile | Né facile né difficile | Difficile | Molto Difficile | Non mi riguarda |
|----------------------------------------------------------------------------------------------------------------------|--------------|--------|------------------------|-----------|-----------------|-----------------|
| Acquisire informazioni sul tuo stato di salute dal medico infettivologo che ti segue per l'HIV                       |              |        |                        |           |                 |                 |
| Trovare le informazioni che desideravi conoscere riguardo ai farmaci anti-HIV che assumi                             |              |        |                        |           |                 |                 |
| Comprendere gli eventuali cambiamenti del tuo piano terapeutico fornito dall'infettivologo che ti segue per l'HIV    |              |        |                        |           |                 |                 |
| Capire le ragioni per le quali assumi certi farmaci anti-HIV e non altri                                             |              |        |                        |           |                 |                 |
| Trovare fonti per te affidabili per avere informazioni mediche sia su vari aspetti dell'HIV sia sui farmaci anti-HIV |              |        |                        |           |                 |                 |
| Capire i suggerimenti e/o le indicazioni dal medico infettivologo che ti segue per l'HIV                             |              |        |                        |           |                 |                 |

##### Farmaci anti-HIV

In merito "ai tempi di riferimento" di queste domande, riferisciti, se pertinente, a una media delle tue esperienze nell'ultimo mese.

##### QUANTO PER TE È STATO UN PROBLEMA....

|                                                                                                    | Non lo è stato | Lo è stato poco | Né poco né molto | Lo è stato un po' | Lo è stato molto | Non mi riguarda |
|----------------------------------------------------------------------------------------------------|----------------|-----------------|------------------|-------------------|------------------|-----------------|
| Organizzarsi praticamente, nel quotidiano, con i farmaci anti-HIV (conservazione, assunzione, ...) |                |                 |                  |                   |                  |                 |
| Assumere i farmaci anti-HIV una volta al giorno                                                    |                |                 |                  |                   |                  |                 |
| Assumere i farmaci anti-HIV più volte al giorno                                                    |                |                 |                  |                   |                  |                 |
| Rifornirsi dei farmaci anti-HIV in                                                                 |                |                 |                  |                   |                  |                 |

|                                                                                        |  |  |  |  |  |  |
|----------------------------------------------------------------------------------------|--|--|--|--|--|--|
| farmacia ospedaliera (o sul territorio se così previsto nella regione di appartenenza) |  |  |  |  |  |  |
|----------------------------------------------------------------------------------------|--|--|--|--|--|--|

#### Indicatori "singoli" di fastidio ai farmaci anti-HIV

In merito "ai tempi di riferimento" di queste domande, riferisciti, se pertinente, a una media delle tue esperienze nell'ultimo mese.

#### QUANTO SEI STATO/A INFASTIDITO/A...

|                                                | Non lo sono stato | Lo sono stato poco | Né poco né molto | Lo sono stato un po' | Lo sono stato molto | Non mi riguarda |
|------------------------------------------------|-------------------|--------------------|------------------|----------------------|---------------------|-----------------|
| ...da quanto devi dipendere dai tuoi farmaci?  |                   |                    |                  |                      |                     |                 |
| ...dagli effetti collaterali dei tuoi farmaci? |                   |                    |                  |                      |                     |                 |

#### Appuntamenti/pratiche riguardanti gli aspetti medici per l'HIV

In merito "ai tempi di riferimento" di queste domande, riferisciti, se pertinente, a una media delle tue esperienze negli ultimi 6 mesi.

#### QUANTO PER TE È STATO UN PROBLEMA....

|                                                                                                                                                                     | Non lo è stato | Lo è stato poco | Né poco né molto | Lo è stato un po' | Lo è stato molto | Non mi riguarda |
|---------------------------------------------------------------------------------------------------------------------------------------------------------------------|----------------|-----------------|------------------|-------------------|------------------|-----------------|
| ...compilare moduli (cioè 'burocrazia') per l'assistenza sanitaria riguardo l'HIV                                                                                   |                |                 |                  |                   |                  |                 |
| ...prenotare i tuoi appuntamenti con il medico infettivologo che ti segue per l'HIV in orari a te convenienti                                                       |                |                 |                  |                   |                  |                 |
| ...assicurarti che quanto deciso con il medico infettivologo fosse poi recepito da altri operatori sanitari (es.: infermieri, farmacisti, altri medici specialisti) |                |                 |                  |                   |                  |                 |
| ...aspettare troppo a lungo alla farmacia ospedaliera (o sul territorio se così previsto nella regione di appartenenza) per ritirare i farmaci anti-HIV             |                |                 |                  |                   |                  |                 |

#### Sfide interpersonali (legate all'HIV)

In merito "ai tempi di riferimento" di queste domande, riferisciti, se pertinente, a una media delle tue esperienze nell'ultimo mese.

#### QUANTO SEI STATO INFASTIDITO/A DA...

|                                                                                                                                               | Non lo sono stato | Lo sono stato poco | Né poco né molto | Lo sono stato un po' | Lo sono stato molto | Non mi riguarda |
|-----------------------------------------------------------------------------------------------------------------------------------------------|-------------------|--------------------|------------------|----------------------|---------------------|-----------------|
| ...sentirsi dipendenti da altre persone per le proprie esigenze sanitarie legate all'HIV                                                      |                   |                    |                  |                      |                     |                 |
| ...altre persone che ti ricordano di fare cose per la tua salute in merito all'HIV come prendere medicine, programmare appuntamenti medici... |                   |                    |                  |                      |                     |                 |
| ...i tuoi bisogni sanitari riguardo all'HIV, perché creano tensione nel rapporto con le altre persone                                         |                   |                    |                  |                      |                     |                 |
| ...altre persone, perché non capiscono la tua situazione riguardo all'HIV                                                                     |                   |                    |                  |                      |                     |                 |

#### Limitazioni del ruolo e dell'attività sociale (in ambito HIV)

In merito "ai tempi di riferimento" di queste domande, riferisciti, se pertinente, a una media delle tue esperienze nell'ultimo mese.

#### QUANTO L'HIV, NELLA CURA DI TE STESSO/A, HA INTERFERITO CON...

|                                                                | Non ha interferito | Un po'... | Né sì né no | Abbastanza | Ha interferito molto | Non mi riguarda |
|----------------------------------------------------------------|--------------------|-----------|-------------|------------|----------------------|-----------------|
| Il lavoro (compreso il lavoro da casa)                         |                    |           |             |            |                      |                 |
| Le responsabilità familiari                                    |                    |           |             |            |                      |                 |
| Le attività quotidiane                                         |                    |           |             |            |                      |                 |
| Le attività del tempo libero                                   |                    |           |             |            |                      |                 |
| La capacità di trascorrere del tempo con la famiglia e/o amici |                    |           |             |            |                      |                 |
| La capacità di viaggiare per lavoro, vacanza, ...              |                    |           |             |            |                      |                 |

#### Esaurimento fisico e mentale (in ambito HIV)

In merito "ai tempi di riferimento" di queste domande, riferisciti, se pertinente, a una media delle tue esperienze nell'ultimo mese.

#### QUANTE VOLTE L'HIV, NELLA CURA DI TE STESSO/A, TI HA FATTO SENTIRE...

|               | Mai | Raramente | Qualche volta | Spesso | Sempre | Non mi riguarda |
|---------------|-----|-----------|---------------|--------|--------|-----------------|
| Arrabbiato/a  |     |           |               |        |        |                 |
| Preoccupato/a |     |           |               |        |        |                 |
| Depresso/a    |     |           |               |        |        |                 |
| Sfinito/a     |     |           |               |        |        |                 |
| Frustrato/a   |     |           |               |        |        |                 |

**English translation of the survey**

**UNDERSTANDING THE EXPERIENCE OF PEOPLE WITH HIV ABOUT TREATMENT AND HEALTH MANAGEMENT FROM THEIR OWN EXPERIENCE**

SURVEY FOR PEOPLE LIVING WITH HIV ON ANTIRETROVIRAL THERAPY

**1. Socio-demographic characteristics**

**WHO ARE YOU?**

**CAN YOU TELL US SOMETHING ABOUT YOURSELF**

**Year of birth:** .....

**Gender at birth**

|        |                          |
|--------|--------------------------|
| Male   | <input type="checkbox"/> |
| Female | <input type="checkbox"/> |

**How do you perceive your gender identity?**

|        |                          |
|--------|--------------------------|
| Male   | <input type="checkbox"/> |
| Female | <input type="checkbox"/> |
| Other  | <input type="checkbox"/> |

**How you identify yourself?**

|                                                                        |                          |
|------------------------------------------------------------------------|--------------------------|
| Cisgender*<br><i>*person who identifies with sex assigned at birth</i> | <input type="checkbox"/> |
| Transgender                                                            | <input type="checkbox"/> |

**How would you describe your sexual orientation?**

|               |                          |
|---------------|--------------------------|
| Homosexual    | <input type="checkbox"/> |
| Bisexual      | <input type="checkbox"/> |
| Eterosexual   | <input type="checkbox"/> |
| Not specified | <input type="checkbox"/> |

**What is the highest level of education completed?**

|                                    |                          |
|------------------------------------|--------------------------|
| Lower secondary school             | <input type="checkbox"/> |
| Higher secondary school            | <input type="checkbox"/> |
| Degree                             | <input type="checkbox"/> |
| Post-graduate 's degree            | <input type="checkbox"/> |
| Other/don't know/don't want answer | <input type="checkbox"/> |

**Country of birth:** .....

**What ethnic group do you belong to?**

|                                    |                          |
|------------------------------------|--------------------------|
| Caucasian                          | <input type="checkbox"/> |
| Afro-american                      | <input type="checkbox"/> |
| Asiatic                            | <input type="checkbox"/> |
| Latin-american                     | <input type="checkbox"/> |
| Mixed                              | <input type="checkbox"/> |
| Other/don't know/don't want answer | <input type="checkbox"/> |

**Region of residency**

|            |                          |          |                          |
|------------|--------------------------|----------|--------------------------|
| Abruzzo    | <input type="checkbox"/> | Molise   | <input type="checkbox"/> |
| Basilicata | <input type="checkbox"/> | Piemonte | <input type="checkbox"/> |
| Calabria   | <input type="checkbox"/> | Puglia   | <input type="checkbox"/> |
| Campania   | <input type="checkbox"/> | Sardegna | <input type="checkbox"/> |



|                       |                          |                     |                          |
|-----------------------|--------------------------|---------------------|--------------------------|
| Emilia-Romagna        | <input type="checkbox"/> | Sicilia             | <input type="checkbox"/> |
| Friuli-Venezia Giulia | <input type="checkbox"/> | Toscana             | <input type="checkbox"/> |
| Lazio                 | <input type="checkbox"/> | Trentino-Alto Adige | <input type="checkbox"/> |
| Liguria               | <input type="checkbox"/> | Umbria              | <input type="checkbox"/> |
| Lombardia             | <input type="checkbox"/> | Valle d'Aosta       | <input type="checkbox"/> |
| Marche                | <input type="checkbox"/> | Veneto              | <input type="checkbox"/> |

**Which situation best describes your relational status now?**

|                                                           |                          |
|-----------------------------------------------------------|--------------------------|
| Single (only)                                             | <input type="checkbox"/> |
| Married or civilly united                                 | <input type="checkbox"/> |
| "I'm in a relationship and living with someone"           | <input type="checkbox"/> |
| "I'm in a relationship, but I'm not living with someone". | <input type="checkbox"/> |
| Widowed                                                   | <input type="checkbox"/> |
| Divorced                                                  | <input type="checkbox"/> |
| Other / don't know / don't want to answer                 | <input type="checkbox"/> |

**Which of the following statements best describes your job status now?**

|                                                              |                          |
|--------------------------------------------------------------|--------------------------|
| I work permanently                                           | <input type="checkbox"/> |
| I work, but I am (or feel) precarious                        | <input type="checkbox"/> |
| I don't work because I can't find it, but I'm looking for it | <input type="checkbox"/> |
| Not working and not looking for work                         | <input type="checkbox"/> |
| Retired                                                      | <input type="checkbox"/> |
| Other / don't know / don't want to answer                    | <input type="checkbox"/> |

**2. HIV characteristics**

**NOW WE ASK YOU SOME DATA ABOUT YOUR HIV AND YOUR HEALTH**

**When did you receive your diagnosis of HIV infection?**

|              |                          |
|--------------|--------------------------|
| Before 2000  | <input type="checkbox"/> |
| 2001 to 2010 | <input type="checkbox"/> |
| 2011 to 2015 | <input type="checkbox"/> |
| 2016 onwards | <input type="checkbox"/> |

**How do you think you acquired the HIV infection?**

|                                                                                     |                          |
|-------------------------------------------------------------------------------------|--------------------------|
| Sexual intercourse with persons of the same sex (to be understood as 'at birth')    | <input type="checkbox"/> |
| Sexual intercourse with persons of a different sex (to be understood as 'at birth') | <input type="checkbox"/> |
| Sexual intercourse (not specified)                                                  | <input type="checkbox"/> |
| Other modes, non-sexual                                                             | <input type="checkbox"/> |

**When did you start the first antiretroviral treatment?**

|              |                          |
|--------------|--------------------------|
| Before 2000  | <input type="checkbox"/> |
| 2001 to 2010 | <input type="checkbox"/> |
| 2011 to 2015 | <input type="checkbox"/> |
| 2016 onwards | <input type="checkbox"/> |

**Do you remember your last CD4 cell count (per ml)?**

|                   |                          |
|-------------------|--------------------------|
| LESS THAN 200     | <input type="checkbox"/> |
| FROM 200 TO 500   | <input type="checkbox"/> |
| MORE THAN 500     | <input type="checkbox"/> |
| I DO NOT REMEMBER | <input type="checkbox"/> |

**Do you remember your last plasma HIV-RNA?**

|                                     |                          |
|-------------------------------------|--------------------------|
| NOT DETECTED (undetectable)         | <input type="checkbox"/> |
| DETECTED BETWEEN 50 AND 200 (cp/mL) | <input type="checkbox"/> |
| DETECTED OVER 200 (cp/mL)           | <input type="checkbox"/> |
| I DO NOT REMEMBER                   | <input type="checkbox"/> |

**Which drug do you take for HIV?**

Note: a tablet, i.e. a 'drug' with a given commercial name, may contain one or more 'active substances'.

|                                                                                                                                                       |                          |
|-------------------------------------------------------------------------------------------------------------------------------------------------------|--------------------------|
| Two active substances in a tablet ( <i>Dovato®</i> , <i>Juluca®</i> )                                                                                 | <input type="checkbox"/> |
| Three active substances in a tablet ( <i>Atripla®</i> , <i>Biktarvy®</i> , <i>Delstrigo®</i> , <i>Eviplera®</i> , <i>Odefsey®</i> , <i>Triumeq®</i> ) | <input type="checkbox"/> |
| Four active substances in a table ( <i>Genvoya®</i> , <i>Stribild®</i> , <i>Symtuza®</i> )                                                            | <input type="checkbox"/> |
| Two active substances in two/three tablets                                                                                                            | <input type="checkbox"/> |
| Three/four active substances in two/three tablets-all drugs on the market                                                                             | <input type="checkbox"/> |
| I am also taking HIV drugs that are not yet on the market (experimental drugs)                                                                        | <input type="checkbox"/> |
| Other                                                                                                                                                 | <input type="checkbox"/> |
| Do not remember                                                                                                                                       | <input type="checkbox"/> |

**Are you satisfied with your HIV treatment?**

|                                           |                          |
|-------------------------------------------|--------------------------|
| Yes, completely                           | <input type="checkbox"/> |
| Yes, but I think it can be improved       | <input type="checkbox"/> |
| No, because I have problems               | <input type="checkbox"/> |
| No, I am not at all                       | <input type="checkbox"/> |
| Other / don't know / don't want to answer | <input type="checkbox"/> |

**Why did your HIV treatment was changed last time??**

|                                                                                                                                     |                          |
|-------------------------------------------------------------------------------------------------------------------------------------|--------------------------|
| What I'm taking is my first treatment, I've never changed it.                                                                       | <input type="checkbox"/> |
| Because I wasn't well, I couldn't tolerate it (side effects) and I talked to my doctor about it.                                    | <input type="checkbox"/> |
| Because the biochemical tests (i.e. liver, kidney, cholesterol, triglycerides, etc.) were not going well and the doctor changed it. | <input type="checkbox"/> |
| Because my doctor suggested another treatment for no particular reason.                                                             | <input type="checkbox"/> |
| Because I was taking too many tablets or because I was taking it several times a day.                                               | <input type="checkbox"/> |
| Because I changed from three active ingredients (even in one tablet) to two active ingredients (even in one tablet).                | <input type="checkbox"/> |
| Because I switched from two active ingredients (even in one tablet) to three active ingredients (even in one tablet)                | <input type="checkbox"/> |
| Because the viral load had increased and therefore there was an efficacy problem                                                    | <input type="checkbox"/> |
| Other / don't know / don't want to answer                                                                                           | <input type="checkbox"/> |

**About HIV I talk to.....(Possible multiple answers)**

|                        |                          |
|------------------------|--------------------------|
| All -                  | <input type="checkbox"/> |
| My colleagues -        | <input type="checkbox"/> |
| Most friends/friends - | <input type="checkbox"/> |
| My family -            | <input type="checkbox"/> |
| My partner -           | <input type="checkbox"/> |

|                                              |                          |
|----------------------------------------------|--------------------------|
| A few (even just one) particular friend(s) - | <input type="checkbox"/> |
| My doctor/nurse and nobody else - Other      | <input type="checkbox"/> |
| Other / don't know / don't want to answer -  | <input type="checkbox"/> |

**I would....(Possible multiple answers)**

|                                                                                             |                          |
|---------------------------------------------------------------------------------------------|--------------------------|
| Having more say in choosing my HIV treatment                                                | <input type="checkbox"/> |
| To be able to take my HIV treatment not every day, thanks to specially designed medications | <input type="checkbox"/> |
| Have more frequent dialogue with my infectious diseases doctor                              | <input type="checkbox"/> |
| Being more in control of certain medical aspects                                            | <input type="checkbox"/> |
| Talking more with someone (a professional) not only about the medical aspects of HIV        | <input type="checkbox"/> |
| Know when new drugs are coming and why.                                                     | <input type="checkbox"/> |
| To have a more sincere dialogue with my infectious diseases doctor.                         | <input type="checkbox"/> |
| None of the above                                                                           | <input type="checkbox"/> |

**3. General Health status**

**WE NOW ASK YOU FOR SOME DATA ON OTHER ASPECTS OF YOUR HEALTH..**

**IN THE LAST MONTH, HOW WOULD YOU DESCRIBE YOUR STATE OF HEALTH?**

|                 | VERY GOOD                | QUITE GOOD               | NORMAL                   | POOR                     | VERY UNSATISFACTORY      |
|-----------------|--------------------------|--------------------------|--------------------------|--------------------------|--------------------------|
| Physical health | <input type="checkbox"/> |
| Mental health   | <input type="checkbox"/> |
| Sexual health   | <input type="checkbox"/> |
| Overall health  | <input type="checkbox"/> |

**CONSIDERING ALL THE DRUGS OR WHAT YOU TAKE CONTINUOUSLY (whether anti-HIV, for other co-diseases or otherwise), HOW MANY PILLS, BOTTLES, ETC... DO YOU TAKE EACH DAY?**

1  2  3  4  5  6  7  8  9  10  more than 10

**...and how many times per day**

1  2  3  4  5  more than 5

**For you....**

|                                                                  |                          |
|------------------------------------------------------------------|--------------------------|
| ...HIV is the most important health problem (i.e. disease)       | <input type="checkbox"/> |
| ...HIV is not the most important health problem (i.e. pathology) | <input type="checkbox"/> |
| Don't know/won't answer                                          | <input type="checkbox"/> |

**I do physical activity/sport ....**

|                                           |                          |
|-------------------------------------------|--------------------------|
| Continuously (2 times a week)             | <input type="checkbox"/> |
| 2-4 times per month                       | <input type="checkbox"/> |
| No, I don't do it                         | <input type="checkbox"/> |
| Other / don't know / don't want to answer | <input type="checkbox"/> |

**I eat....**

|                                                                                    |                          |
|------------------------------------------------------------------------------------|--------------------------|
| In a controlled way, healthy food, following a certain diet at least 5 days a week | <input type="checkbox"/> |
| In a controlled way, healthy food, following a certain diet at least 2 days a week | <input type="checkbox"/> |
| In a non-controlled way                                                            | <input type="checkbox"/> |
| Other / don't know / don't want to answer                                          | <input type="checkbox"/> |

**I drink alcohol....**

|                                                                         |                          |
|-------------------------------------------------------------------------|--------------------------|
| In a controlled way, in company, a couple of drinks 2 days out of 7 -   | <input type="checkbox"/> |
| In a controlled way, in company, a couple of drinks 4/5 days out of 7 - | <input type="checkbox"/> |

|                                           |                          |
|-------------------------------------------|--------------------------|
| In an uncontrolled way -                  | <input type="checkbox"/> |
| Other / don't know / don't want to answer | <input type="checkbox"/> |

**4. HIV treatment burden**

**TELL US ABOUT YOUR EXPERIENCE WITH ANTI-HIV TREATMENT, CARE AND HIV**

**MEDICAL INFORMATION ON HIV**

Regarding the "reference times" of these questions, please refer, if relevant, to an average of your experiences in the **last 6 months**.

**How easy/difficult has it been for you to.....**

|                                                                                                          | Very easy | Easy | Neither easy nor difficult | difficult | Very difficult | Not applicable |
|----------------------------------------------------------------------------------------------------------|-----------|------|----------------------------|-----------|----------------|----------------|
| Get information about your health status from the infectious diseases doctor who is treating you for HIV |           |      |                            |           |                |                |
| Finding out the information you wanted to know about the HIV drugs you take                              |           |      |                            |           |                |                |
| Understand any changes in your treatment plan provided by your HIV infectious disease specialist         |           |      |                            |           |                |                |
| Understand the reasons why you take certain HIV drugs and not others                                     |           |      |                            |           |                |                |
| Find reliable sources for medical information on various aspects of HIV as well as on HIV medication.    |           |      |                            |           |                |                |
| understand suggestions and/or guidance from your HIV infectious diseases physician                       |           |      |                            |           |                |                |

**ANTI-HIV MEDICATIONS**

Regarding the "reference times" of these questions, please refer, if relevant, to an average of your experiences in the last month.

**HOW MUCH OF A PROBLEM HAS IT BEEN FOR YOU TO.....**

|                                                                                           | Not at all | A little | Somewhat | Quite a bit | Very much | Not applicable |
|-------------------------------------------------------------------------------------------|------------|----------|----------|-------------|-----------|----------------|
| Organize yourself practically in everyday life with HIV medication (storage, taking, ...) |            |          |          |             |           |                |
| Take HIV medication once a day                                                            |            |          |          |             |           |                |

|                                                                                                             |  |  |  |  |  |  |
|-------------------------------------------------------------------------------------------------------------|--|--|--|--|--|--|
| Take HIV medication several times a day                                                                     |  |  |  |  |  |  |
| Take HIV medication several times a day at the hospital pharmacy (or locally if so provided in your region) |  |  |  |  |  |  |

**'SINGLE-ITEM' INDICATORS OF HIV-MEDICATION BOTHER:**

Regarding the "reference times" of these questions, please refer, if relevant, to an average of your experiences in the last month.

**HOW BOTHERED HAVE YOU BEEN BY....**

|                                                      | Not at all | A little | Somewhat | Quite a bit | Very much | Not applicable |
|------------------------------------------------------|------------|----------|----------|-------------|-----------|----------------|
| ...how much do you have to rely on your medicine(s)? |            |          |          |             |           |                |
| ... the side effects of your medicine(s)?            |            |          |          |             |           |                |

**HIV MEDICAL APPOINTMENTS AND HEALTHCARE SERVICES**

Regarding the "reference times" of these questions, please refer, if relevant, to an average of your experiences in the last 6 months.

**HOW MUCH OF A PROBLEM HAS IT BEEN FOR YOU TO....**

|                                                                                                                                                                                      | Not at all | A little | Somewhat | Quite a bit | Very much | Not applicable |
|--------------------------------------------------------------------------------------------------------------------------------------------------------------------------------------|------------|----------|----------|-------------|-----------|----------------|
| ...filling in forms (i.e. 'paperwork') for HIV-related health care                                                                                                                   |            |          |          |             |           |                |
| ...book your appointments with your HIV infectious disease doctor at times convenient to you                                                                                         |            |          |          |             |           |                |
| ...make sure that the decisions made with the infectious diseases doctor are then taken on board by other health professionals (e.g. nurses, pharmacists, other medical specialists) |            |          |          |             |           |                |
| ... wait too long at the hospital pharmacy (or at the local                                                                                                                          |            |          |          |             |           |                |

|                                                                              |  |  |  |  |  |  |
|------------------------------------------------------------------------------|--|--|--|--|--|--|
| pharmacy if this is the case in your region) to pick up your HIV medication. |  |  |  |  |  |  |
|------------------------------------------------------------------------------|--|--|--|--|--|--|

**INTERPERSONAL CHALLENGES RELATED TO HIV**

Regarding the "reference times" of these questions, please refer, if relevant, to an average of your experiences in the last month.

**HOW BOTHERED HAVE YOU BEEN BY...**

|                                                                                                                                     | Not at all | A little | Somewhat | Quite a bit | Very much | Not applicable |
|-------------------------------------------------------------------------------------------------------------------------------------|------------|----------|----------|-------------|-----------|----------------|
| ...feeling dependent on other people for your HIV-related health needs                                                              |            |          |          |             |           |                |
| ...other people reminding you to do things for your HIV-related health such as taking medicines, scheduling medical appointments... |            |          |          |             |           |                |
| ...your HIV-related health needs, because they create tension in your relationship with other people                                |            |          |          |             |           |                |
| ...other people, because they do not understand your HIV situation.                                                                 |            |          |          |             |           |                |

**ROLE AND SOCIAL ACTIVITY LIMITATIONS**

Regarding the "reference times" of these questions, please refer, if relevant, to an average of your experiences in the last month.

**HOW MUCH HAS THE HIV, IN YOUR SELF-CARE, INTERFERED WITH YOUR...**

|                                                      | Not at all | A little | Somewhat | Quite a bit | Very much | Not applicable |
|------------------------------------------------------|------------|----------|----------|-------------|-----------|----------------|
| Work (including working at home)                     |            |          |          |             |           |                |
| Family responsibilities                              |            |          |          |             |           |                |
| Daily activities                                     |            |          |          |             |           |                |
| Hobbies and leisure activities                       |            |          |          |             |           |                |
| The ability to spend time with family and/or friends |            |          |          |             |           |                |
| The ability to travel for work, holidays, ...        |            |          |          |             |           |                |

**PHYSICAL AND MENTAL EXHAUSTION HIV-RELATED**

Regarding the "reference times" of these questions, please refer, if relevant, to an average of your experiences in the month.

**HOW OFTEN THE HIV, IN YOUR SELF-CARE, MAKE YOU FEEL...**

|             | <b>Never</b> | <b>Rarely</b> | <b>Sometimes</b> | <b>Often</b> | <b>Always</b> | <b>Not applicable</b> |
|-------------|--------------|---------------|------------------|--------------|---------------|-----------------------|
| Angry       |              |               |                  |              |               |                       |
| Preoccupied |              |               |                  |              |               |                       |
| Depressed   |              |               |                  |              |               |                       |
| Worn out    |              |               |                  |              |               |                       |
| Frustrated  |              |               |                  |              |               |                       |
